# Supplementary material for: Transcriptomic and Physiological Analyses Reveal the Molecular Mechanism through Which Exogenous Melatonin Increases Drought Stress Tolerance in Chrysanthemum
Source: MDPI journal article supplement (doi:10.3390/plants12071489), 2023-03-29
Supplement: s1 [file s1]

## Quantitative primer design

Supplementary Table S1 Quantitative primers of candidate genes

| Gene name   | Primer         | Sequence(5'-3')          |
|-------------|----------------|--------------------------|
| EFlα        | Forward primer | TTTGGTATCTGGTCCTGGAG     |
|             | Reverse primer | CCATTCAAGCGACAGACTCA     |
| AP2/ERF-AP2 | Forward primer | AACTGTCCGTATCGTGAGAATG   |
|             | Reverse primer | CCAATCATCCTCCTCATCATC    |
| bHLH130     | Forward primer | TCTGGGAAATCAACCACCTATG   |
|             | Reverse primer | ACGAATCTTACACGGAACAGAA   |
| Tify9       | Forward primer | GCTTTCGGATCGTCGAGATATT   |
|             | Reverse primer | GAAACCCGAGCTAGCAGATG     |
| Tify6B      | Forward primer | GCGGTATGGTGAATGTCTATGA   |
|             | Reverse primer | GTGTCCTTGGTTGAGGTGAA     |
| Tify10A     | Forward primer | CTTGGAGAAGAGGAAAGACAGAA  |
|             | Reverse primer | CCAAGTCCCAACCATGTCTTA    |
| MYB62       | Forward primer | CCTTACCATCCACAAACCAAAC   |
|             | Reverse primer | CGACAACATCTTCCCACTAGAA   |
| MYBelated   | Forward primer | GGACACCAAGTGACTCATGTATAG |
|             | Reverse primer | ACGGATGTTGGGTTGAGTTAG    |
| WRKY24      | Forward primer | GCTGTATCACCTCTTCGTATTT   |
|             | Reverse primer | CGGAGACGGCAATATGTTAGAA   |
| EIN3        | Forward primer | TGGGTTTCTTGATCGGTCTTC    |
|             | Reverse primer | GAGGTGGGTTCAAGCATTATAG   |
| zf-HD       | Forward primer | TCTGCTGACGGTTTGTCTTTA    |
|             | Reverse primer | CCGGTACTAGGTCTATGGTAGT   |
| JOX1        | Forward primer | AAAGCATTTGGTGGTGAAGATG   |
|             | Reverse primer | GGATCCGAGTGAGACGATAGA    |
| GPX4        | Forward primer | GGTTCCTTGGCGACAGTATTA    |

|       |                |                         |
|-------|----------------|-------------------------|
| HIP39 | Reverse primer | ACTTGTGGTGGGTGCATATC    |
|       | Forward primer | GGTGGTACTCAAGGTTCTTACC  |
| ABA4  | Reverse primer | CCCGATCACAGTTAGTTTCTGA  |
|       | Forward primer | CTCGTGGACACCTGATACAATAA |
| GRAS  | Reverse primer | TGTATCCAAGCTGAGGCTAATG  |
|       | Forward primer | CACTAACTGCTGAAGGGCTAATA |
|       | Reverse primer | AGAAGATAACCGAGCCACAAG   |

---
